# Supplementary material for: Polymer-Supported Oxidovanadium(IV) Complexes and Their Catalytic Applications in One-Pot Multicomponent Reactions Producing Biologically Active 2,4,5-Trisubstituted-1H-imidazoles
Source: MDPI journal article supplement (doi:10.3390/catal13030615), 2023-03-19
Supplement: s1 [file s1]

## Supporting Information

# Polymer-Supported Oxidovanadium(IV) Complexes and Their Catalytic Applications in One-Pot Multicomponent Reactions Producing Biologically Active 2,4,5-Trisubstituted-1*H*-imidazoles

Mannar R. Maurya <sup>1,\*</sup>, Monojit Nandi <sup>1</sup>, Akhil Patter <sup>2</sup>, Fernando Avecilla <sup>2</sup> and Kaushik Ghosh <sup>1</sup>

<sup>1</sup> Department of Chemistry, Indian Institute of Technology Roorkee, Roorkee 247667, India

<sup>2</sup> Grupo NanoToxGen, Centro Interdisciplinar de Química y Biología (CICA), Departamento de Química, Facultade de Ciencias, Campus de A Coruña, Universidade da Coruña, 15071 A Coruña, Spain

\* Correspondence: m.maurya@cy.iitr.ac.in

**Table S1.** Selected bond lengths [Å] and angles [°] for the for the HL<sub>1</sub> (**I**).

| Bond lengths |          | Bond angles     |            |
|--------------|----------|-----------------|------------|
| C(1)–N(1)    | 1.285(2) | N(2)–N(1)–C(1)  | 121.39(15) |
| N(1)–N(2)    | 1.361(2) | C(8)–N(2)–N(1)  | 117.45(14) |
| C(8)–N(2)    | 1.405(2) | C(14)–N(2)–N(1) | 120.85(14) |
| C(14)–N(2)   | 1.447(2) | C(14)–N(2)–C(8) | 121.67(15) |

**Table S2.** Selected bond lengths [Å] and angles [°] for complex **1**.

| Bond lengths |            | Bond angles    |          |
|--------------|------------|----------------|----------|
| V(1)–N(1)    | 2.1042(12) | O(1)–V(1)–N(1) | 95.70(6) |
| V(1)–N(3)    | 2.0995(13) | O(2)–V(1)–N(1) | 88.83(5) |
| V(1)–O(1)    | 1.6002(15) | O(2)–V(1)–O(1) | 99.35(8) |
| V(1)–O(2)    | 1.9553(13) | N(3)–V(1)–N(1) | 87.75(5) |

|            |            |                  |           |
|------------|------------|------------------|-----------|
| V(1)–O(3A) | 2.1303(14) | N(3)–V(1)–O(1)   | 91.09(6)  |
| V(1)–O(4A) | 1.9997(13) | N(3)–V(1)–O(2)   | 169.29(7) |
|            |            | O(3A)–V(1)–N(1)  | 85.01(5)  |
|            |            | O(3A)–V(1)–O(1)  | 173.12(6) |
|            |            | O(3A)–V(1)–O(2)  | 87.51(6)  |
|            |            | O(3A)–V(1)–N(3)  | 82.09(5)  |
|            |            | O(4A)–V(1)–N(1)  | 168.01(7) |
|            |            | O(4A)–V(1)–O(1)  | 96.28(8)  |
|            |            | O(4A)–V(1)–O(2)  | 88.74(6)  |
|            |            | O(4A)–V(1)–N(3)  | 92.51(6)  |
|            |            | O(4A)–V(1)–O(3A) | 83.15(7)  |

---

### Analytical and spectral data of ligands

**Data for HL<sub>1</sub> (I):** Yield 1.14 g (67.0 %). Greyish-white powder. C<sub>21</sub>H<sub>18</sub>N<sub>4</sub>O (342.40). Calcd C, 73.6; H, 5.25; N, 16.35. Found C, 73.54; H, 5.21; N, 16.27%. <sup>1</sup>H NMR (500 MHz, DMSO-d<sub>6</sub>, δ/ppm): 12.38 (s, 1H, N–H), 10.46 (s, 1H, O–H), 8.00 (s, 1H, HC=N–), 7.54 – 7.50 (m, 2H, aromatic, 7.43–7.39 (m, 2H, aromatic, 7.37 – 7.31 (m, 4H, aromatic, 7.11 (m, 3H, aromatic, 6.93 (tt, 1H, *J* = 6.9, 1.3 Hz), 6.84 – 6.79 (m, 2H, aromatic, 5.43 (s, 2H, CH<sub>2</sub>). <sup>13</sup>C NMR (126 MHz, DMSO-d<sub>6</sub>, δ/ppm): 156.09, 150.36, 147.31, 134.29, 129.81, 128.01, 121.43, 119.91, 116.48, 115.34, 45.09, 40.03.

**Data for H<sub>2</sub>L<sub>2</sub> (II):** Yield 1.39 g (61.0 %). White powder. C<sub>29</sub>H<sub>34</sub>N<sub>4</sub>O (454.62). Calcd C, 71.39; H, 7.48; N, 12.32. Found C, 71.35; H, 7.41; N, 12.29%. <sup>1</sup>H NMR (500 MHz, DMSO-d<sub>6</sub>, δ/ppm): 12.46 (s, 1H, N–H), 11.84 (s, 1H, O–H), 8.19 (s, 1H, HC=N–), 7.56 (d, 1H, aromatic, *J* = 7.6 Hz), 7.46 (d, 1H, aromatic, *J* = 8.0 Hz), 7.40 (m, 2H, aromatic, 7.28 (d, 2H, aromatic, *J* = 7.9 Hz), 7.20 (d, 1H, aromatic, *J* = 2.4 Hz), 7.18 (d, 1H, aromatic, *J* = 2.3 Hz), 7.15 (ddd, 2H, aromatic, *J* = 9.1, 7.5, 1.2 Hz), 6.99 (t, 1H, aromatic, *J* = 7.3 Hz), 5.54 (s, 2H, CH<sub>2</sub>), 1.43 (s, 9H, <sup>t</sup>but), 1.24 (s, 9H, <sup>t</sup>but). <sup>13</sup>C NMR (126 MHz, DMSO-d<sub>6</sub>, δ/ppm): 153.42, 150.17, 146.69, 143.79, 140.95, 140.36,

135.69, 134.90, 130.00, 125.54, 124.20, 122.59, 121.75, 119.06, 115.01, 111.94, 44.54, 35.15, 34.39, 31.86, 29.91.

### Spectral data of isolated compounds (MCR products)

**Data for 1(a):** Molecular Formula:  $C_{21}H_{16}N_2$ . Mol. Wt.= 296.37 g/mol. Solid white powder.  $^1H$  NMR (500 MHz, DMSO- $d_6$ ,  $\delta$ /ppm): 12.65 (s, 1H, N-H), Aromatic= 8.05 (dt, 2H,  $J$  = 8.2, 1.5 Hz), 7.51 (dt, 2H,  $J$  = 8.1, 1.6 Hz), 7.48 – 7.39 (m, 6H), 7.36 – 7.32 (m, 2H), 7.29 – 7.24 (m, 2H), 7.21 – 7.16 (m, 1H).  $^{13}C$  NMR (126 MHz, DMSO- $d_6$ ,  $\delta$ /ppm): 195.37, 146.03, 137.63, 136.09, 135.70, 131.62, 130.88, 130.14, 130.05, 129.22, 129.19, 128.99, 128.78, 128.72, 128.31, 127.60, 127.04, 125.72.

**Data for 1(b):** Molecular Formula:  $C_{21}H_{15}ClN_2$ . Mol. Wt.= 330.82 g/mol. Solid white powder.  $^1H$  NMR (500 MHz, DMSO- $d_6$ ,  $\delta$ /ppm): 12.79 (s, 1H, N-H), Aromatic= 8.13 – 8.09 (m, 2H), 7.57 – 7.54 (m, 4H), 7.53 – 7.49 (m, 2H), 7.45 (t, 2H,  $J$  = 7.5 Hz), 7.39 (t, 1H,  $J$  = 7.3 Hz), 7.31 (t, 2H,  $J$  = 7.5 Hz), 7.23 (t, 1H,  $J$  = 7.3 Hz).  $^{13}C$  NMR (126 MHz, DMSO- $d_6$ ,  $\delta$ /ppm): 195.36, 144.95, 137.83, 136.09, 135.52, 133.28, 131.44, 130.14, 130.05, 129.72, 129.31, 129.21, 129.10, 128.96, 128.74, 128.41, 127.60, 127.37, 127.15.

**Data for 1(c):** Molecular Formula:  $C_{21}H_{15}BrN_2$ . Mol. Wt.= 375.27 g/mol. Solid white powder.  $^1H$  NMR (500 MHz, DMSO- $d_6$ ,  $\delta$ /ppm): 12.79 (s, 1H, N-H), Aromatic= 8.06 – 8.02 (m), 7.71 – 7.67 (m, 2H), 7.53 (br., 4H), 7.48 – 7.36 (br., 3H), 7.31 (br., 2H), 7.24 (br., 1H).  $^{13}C$  NMR (126 MHz, DMSO- $d_6$ ,  $\delta$ /ppm): 194.86, 144.45, 137.32, 135.59, 135.02, 132.78, 130.94, 129.63, 129.54, 129.22, 128.81, 128.71, 128.59, 128.45, 128.24, 127.91, 127.10, 126.87, 126.64.

**Data for 1(d):** Molecular Formula:  $C_{21}H_{15}N_3O_2$ . Mol. Wt.= 341.37 g/mol. Solid orange powder.  $^1H$  NMR (500 MHz, DMSO- $d_6$ ,  $\delta$ /ppm): 13.14 (s, N-H), Aromatic= 8.34 (q, 4H,  $J$  = 2.2 Hz), 7.84–7.80 (m, 2H), 7.58 – 7.55 (m, 2H), 7.54 – 7.52 (m, 2H), 7.49 – 7.46 (m, 2H), 7.33 (t, 2H,  $J$  = 7.5 Hz).  $^{13}C$  NMR (126 MHz, DMSO- $d_6$ ,  $\delta$ /ppm): 195.35, 147.06, 143.92, 138.99, 136.63, 135.14, 131.04, 130.60, 130.13, 130.04, 129.27, 129.06, 128.81, 127.67, 126.26, 127.79.

**Data for 1(e):** Molecular Formula:  $C_{22}H_{18}N_2O$ . Mol. Wt.= 326.40 g/mol. Solid white powder.  $^1H$  NMR (500 MHz, DMSO- $d_6$ ,  $\delta$ /ppm): 12.52 (s, N-H), Aromatic= 8.05 – 8.01 (m, 2H), 7.56 (d, 2H,  $J$  = 7.1 Hz), 7.50 (d, 2H,  $J$  = 7.1 Hz), 7.44 (t, 2H,  $J$  = 7.6 Hz), 7.36 (t, 1H,  $J$  = 7.3 Hz), 7.30 (t, 2H,  $J$  = 7.5 Hz), 7.22 (t, 1H,  $J$  = 7.3 Hz), 7.08 – 7.03 (m, 2H), 3.82 (s, 1H, -OMe).  $^{13}C$  NMR

(126 MHz, DMSO-d<sub>6</sub>, δ/ppm): 195.36, 159.95, 146.16, 137.29, 129.16, 128.89, 128.68, 128.18, 127.58, 127.23, 123.67, 114.62, 55.73.

**Data for 1(f):** Molecular Formula: C<sub>22</sub>H<sub>18</sub>N<sub>2</sub>. Mol. Wt.= 310.40 g/mol. Solid white powder. <sup>1</sup>H NMR (500 MHz, DMSO-d<sub>6</sub>, δ/ppm): 12.59 (s, N-H), 8.00 – 7.97 (m, 2H), 7.55 (dt, 2H, *J* = 8.1, 1.6 Hz), 7.50 (dt, 2H, *J* = 8.0, 1.7 Hz), 7.44 (t, 2H, *J* = 7.5 Hz), 7.37 (t, 1H, *J* = 7.3 Hz), 7.32 – 7.27 (m, 4H), 7.22 (t, 1H, *J* = 7.3 Hz), 2.35 (s, 3H, -Me). <sup>13</sup>C NMR (126 MHz, DMSO-d<sub>6</sub>, δ/ppm): 195.36, 146.20, 138.20, 137.46, 136.08, 135.80, 132.78, 131.72, 130.13, 130.05, 129.77, 129.16, 128.94, 128.69, 128.46, 128.23, 128.21, 127.59, 126.98, 125.70, 21.42.

**Data for 1(g):** Molecular Formula: C<sub>21</sub>H<sub>15</sub>N<sub>3</sub>O<sub>2</sub>. Mol. Wt.= 341.37 g/mol. Solid yellow powder. <sup>1</sup>H NMR (500 MHz, DMSO-d<sub>6</sub>, δ/ppm): 12.96 (s, N-H), Aromatic= 8.00 (d, 1H, *J* = 7.8 Hz), 7.93 (d, 1H, *J* = 8.1 Hz), 7.79 (t, 1H, *J* = 7.6 Hz), 7.67 – 7.61 (m, 1H), 7.48 (dt, 6H, *J* = 21.3, 7.4 Hz), 7.39 (t, 1H, *J* = 7.3 Hz), 7.31 (t, 2H, *J* = 7.5 Hz), 7.23 (t, 1H, *J* = 7.3 Hz). <sup>13</sup>C NMR (126 MHz, DMSO-d<sub>6</sub>, δ/ppm): 148.87, 141.56, 138.06, 135.25, 132.64, 131.18, 130.30, 130.06, 129.29, 129.25, 128.82, 128.77, 128.56, 127.52, 127.27, 124.55, 123.94.

**Data for 1(h):** Molecular Formula: C<sub>36</sub>H<sub>24</sub>N<sub>4</sub>. Mol. Wt.= 514.63 g/mol. Solid yellow powder. <sup>1</sup>H NMR (500 MHz, DMSO-d<sub>6</sub>, δ/ppm): 10.02 (s, N-H, 2H), 8.29 (d, 4H, *J* = 8.3 Hz), 8.03 – 8.00 (m, 4H), 7.55 – 7.52 (m, 10H), 7.33 (m, 6H). <sup>13</sup>C NMR (126 MHz, DMSO-d<sub>6</sub>, δ/ppm): 193.09, 144.78, 135.87, 135.86, 130.66, 130.12, 130.07, 129.05, 129.02, 128.32, 125.97.

**Data for 1(i):** Molecular Formula: C<sub>15</sub>H<sub>12</sub>N<sub>2</sub>. Mol. Wt.= 220.28 g/mol. Solid white powder. <sup>1</sup>H NMR (500 MHz, DMSO-d<sub>6</sub>, δ/ppm): 12.49 (s, N-H), 7.79 (s, -N=C-H, 1H), 7.46 (d, 4H, *J* = 7.2 Hz), 7.34 (s, br, 4H), 7.27 (s, br, 2H). <sup>13</sup>C NMR (126 MHz, DMSO-d<sub>6</sub>, δ/ppm): 136.15, 128.95, 127.99, 127.39.

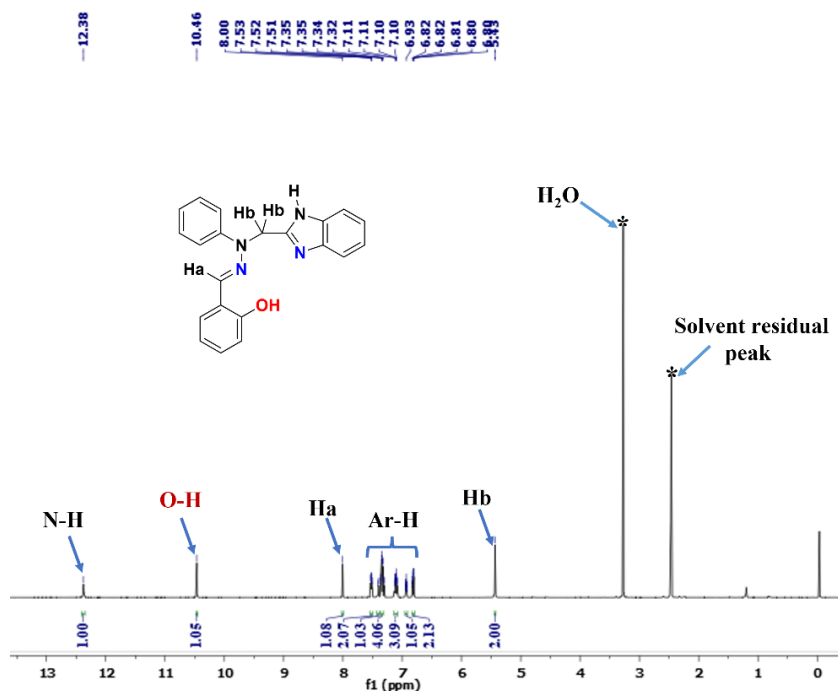

**Figure S1.** <sup>1</sup>H-NMR spectra of ligand **HL1** (**I**) recorded in DMSO-d<sub>6</sub>. \* Indicates the solvent residual peak at  $\delta = 2.5$  ppm and that of moisture at  $\delta = 3.33$  ppm.

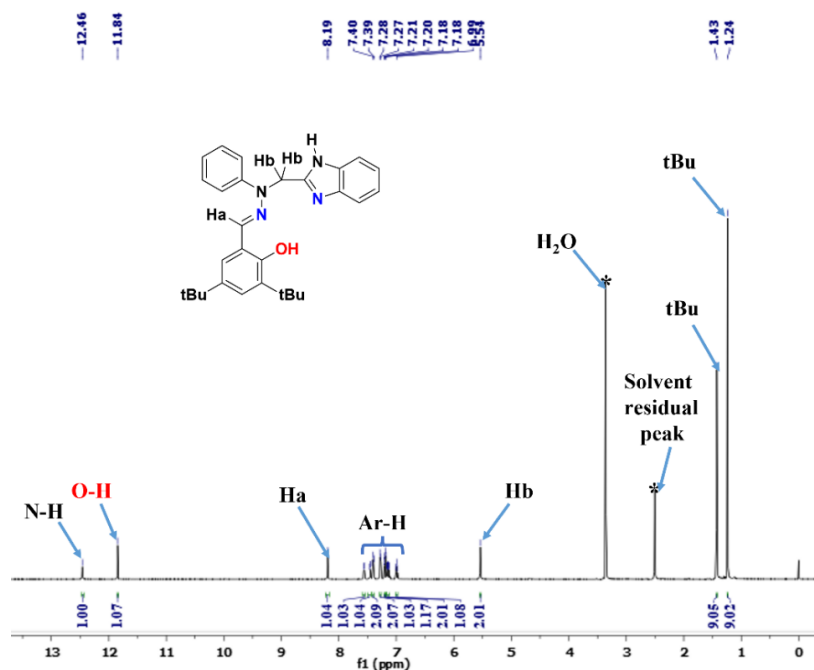

**Figure S2.** <sup>1</sup>H-NMR spectra of ligand **HL2** (**II**) recorded in DMSO-d<sub>6</sub>. \* Indicates the solvent residual peak at  $\delta = 2.5$  ppm and that of moisture at  $\delta = 3.33$  ppm.

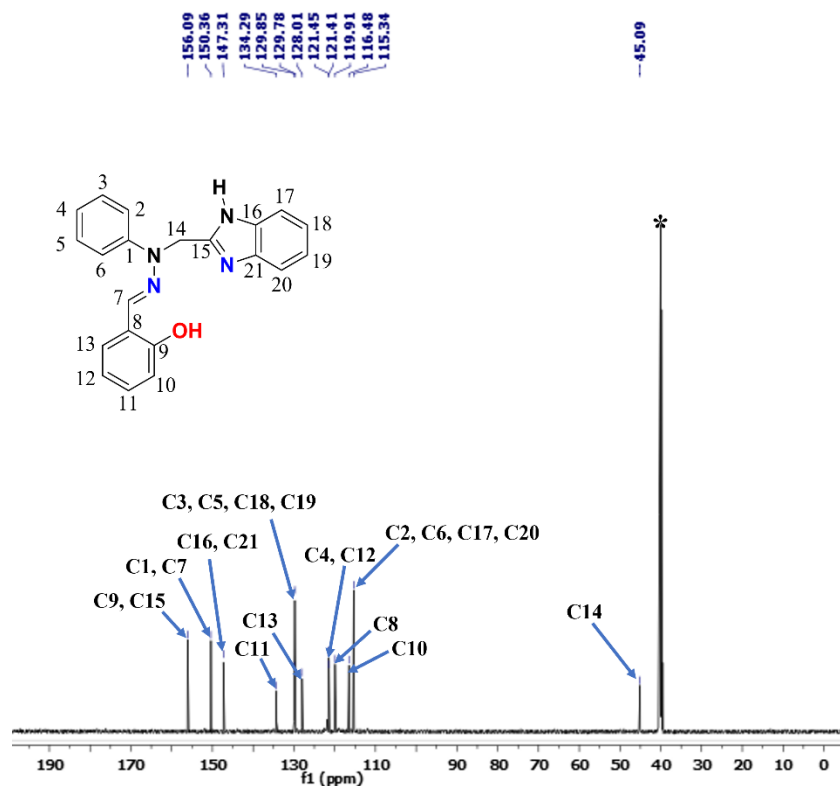

**Figure S3.**  $^{13}\text{C}$ -NMR spectra of ligand **HL1** (I) recorded in  $\text{DMSO-d}_6$ . \* Indicates the solvent residual peak at  $\delta = 40$  ppm.

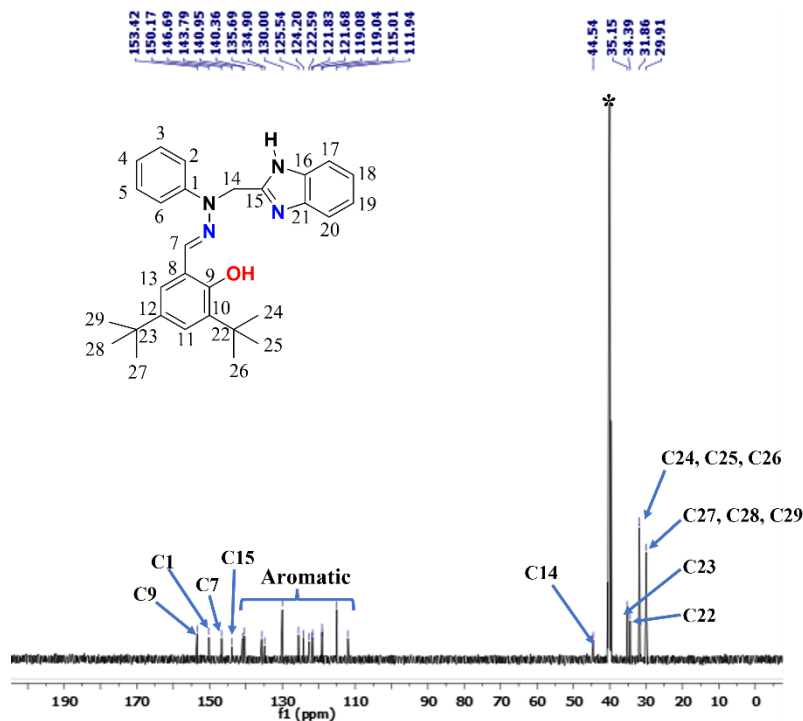

**Figure S4.**  $^{13}\text{C}$ -NMR spectra of ligand **HL2** (II) recorded in  $\text{DMSO-d}_6$ . \* Indicates the solvent residual peak at  $\delta = 40$  ppm.

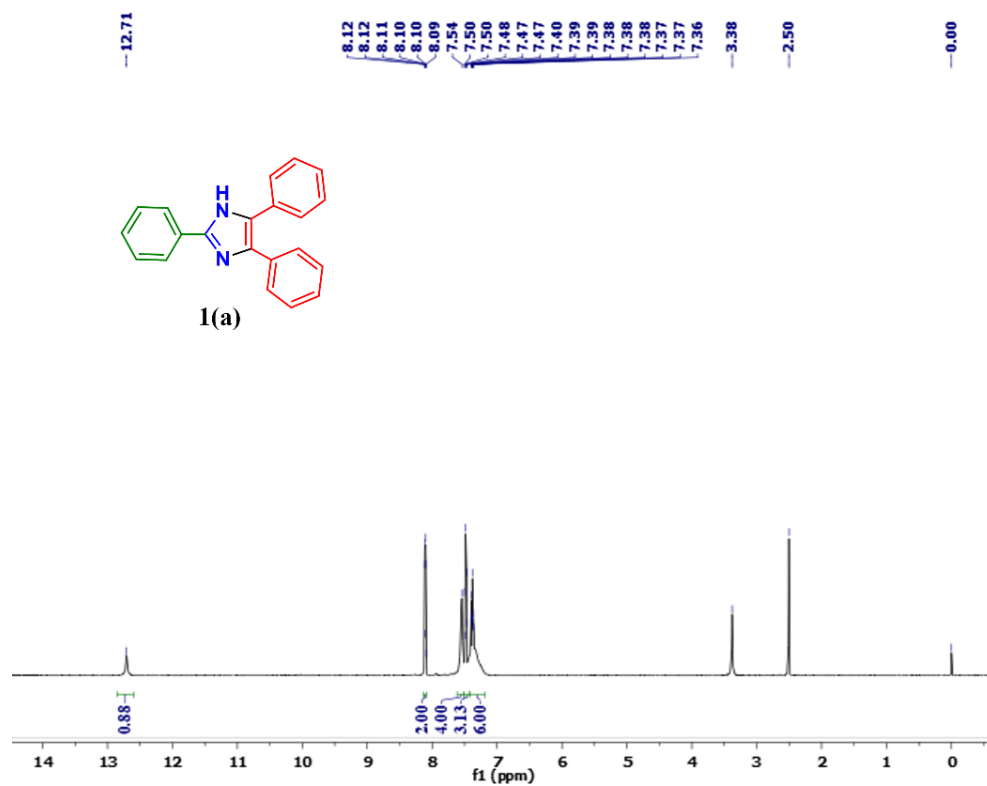

**Figure S5.** <sup>1</sup>H-NMR spectra of **1(a)** recorded in DMSO-d<sub>6</sub>.

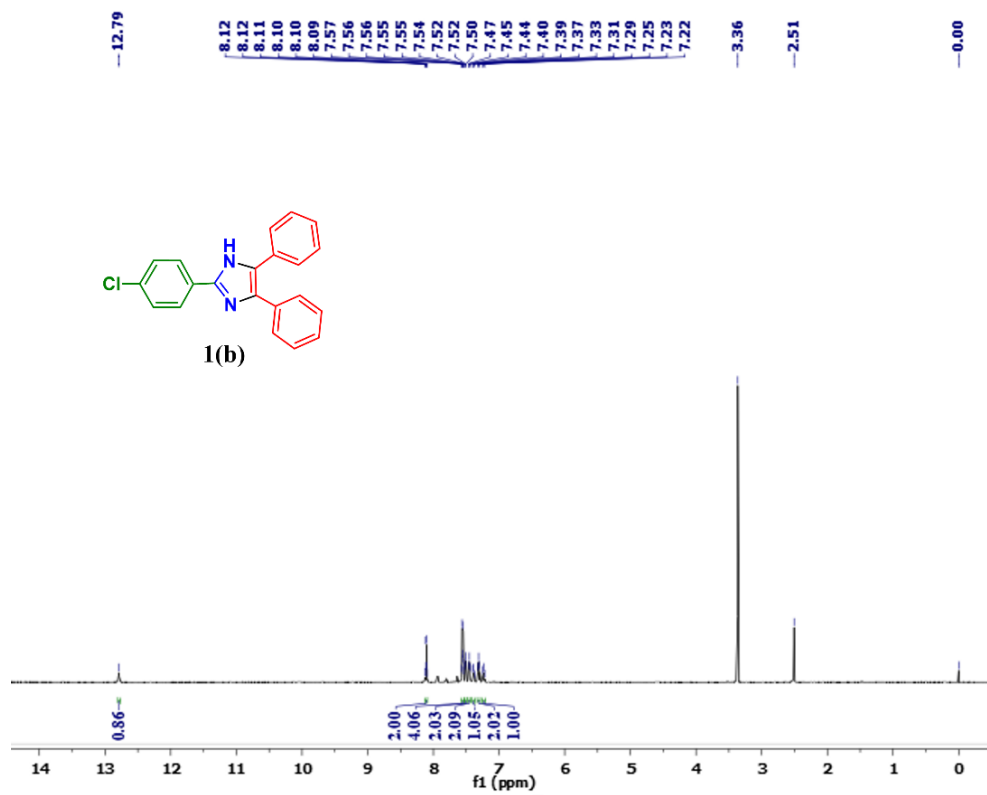

**Figure S6.** <sup>1</sup>H-NMR spectra of **1(b)** recorded in DMSO-d<sub>6</sub>.

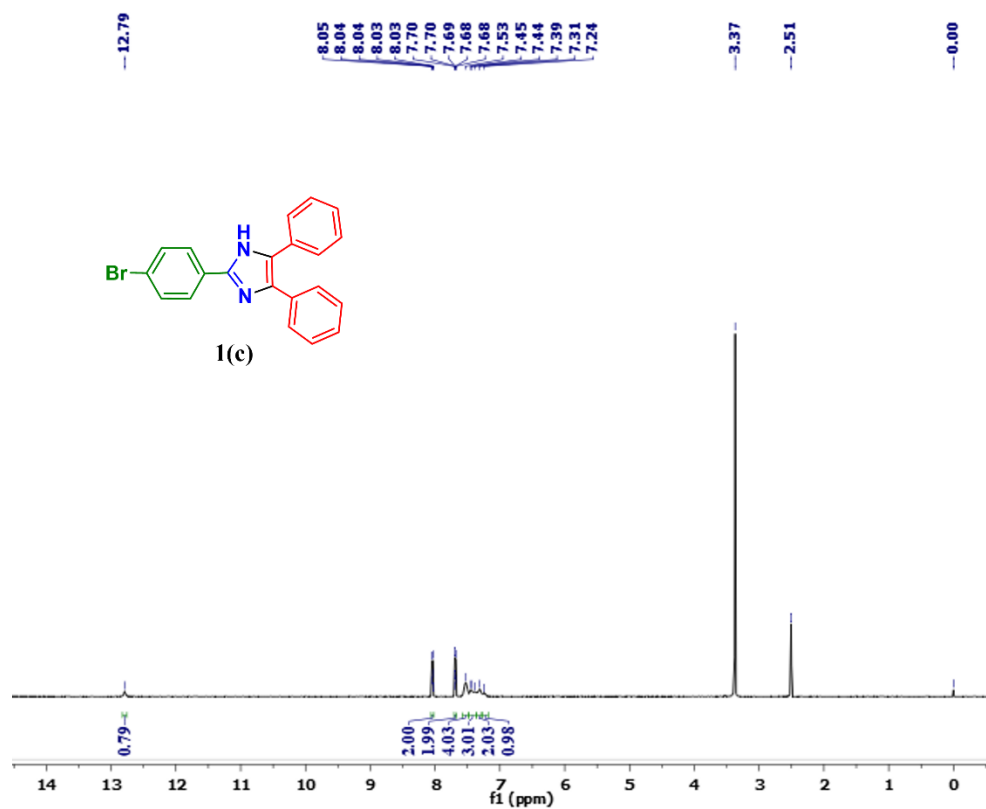

**Figure S7.** <sup>1</sup>H-NMR spectra of **1(c)** recorded in DMSO-d<sub>6</sub>.

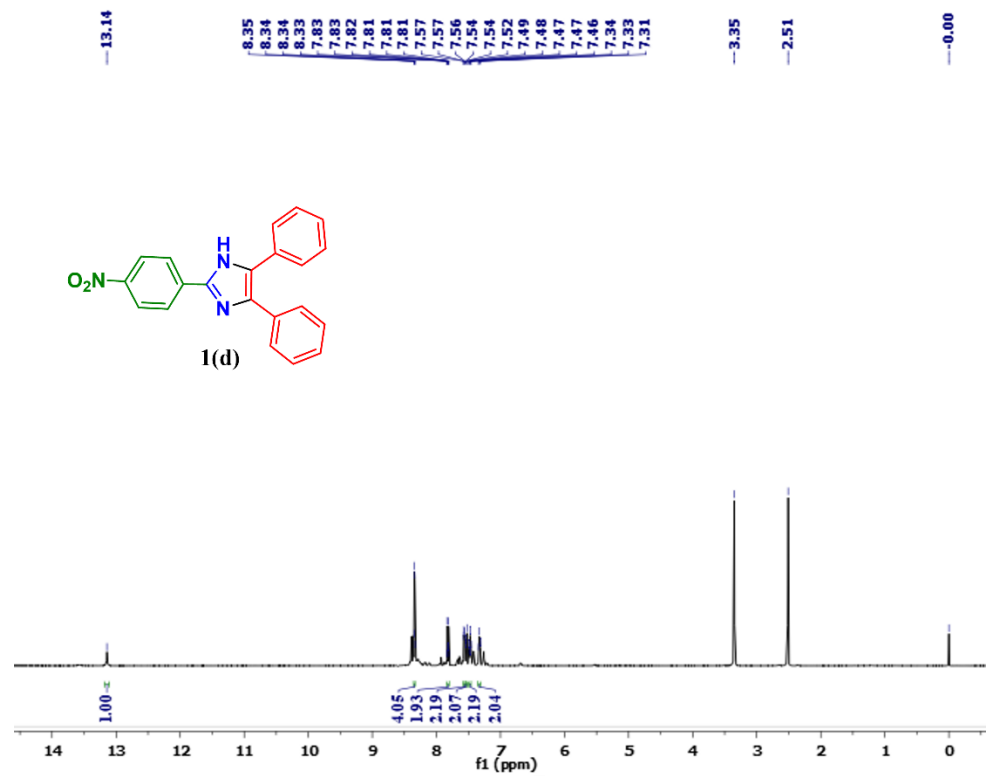

**Figure S8.** <sup>1</sup>H-NMR spectra of **1(d)** recorded in DMSO-d<sub>6</sub>.

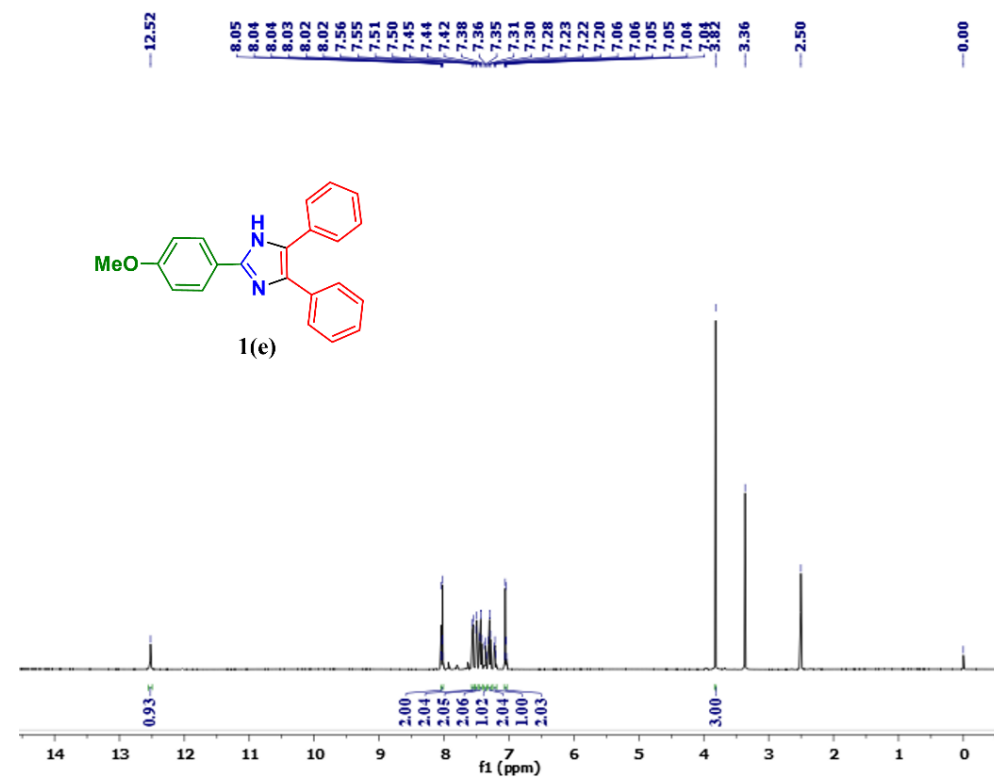

**Figure S9.** <sup>1</sup>H-NMR spectra of **1(e)** recorded in DMSO-d<sub>6</sub>.

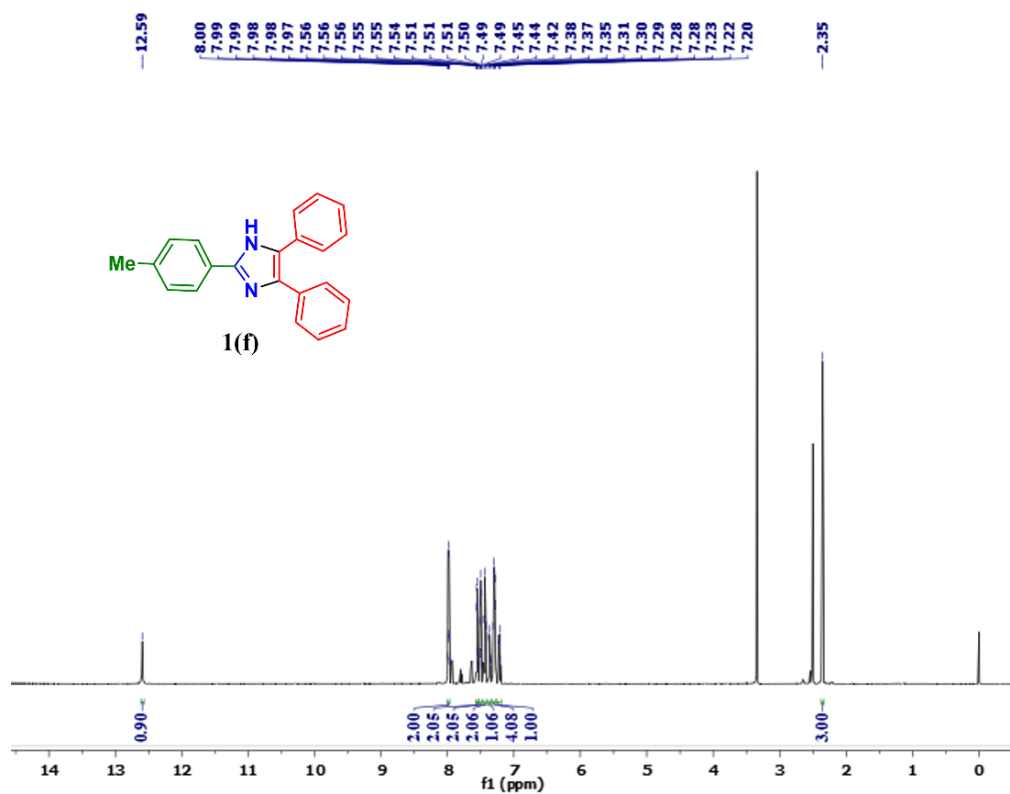

**Figure S10.** <sup>1</sup>H-NMR spectra of **1(f)** recorded in DMSO-d<sub>6</sub>.

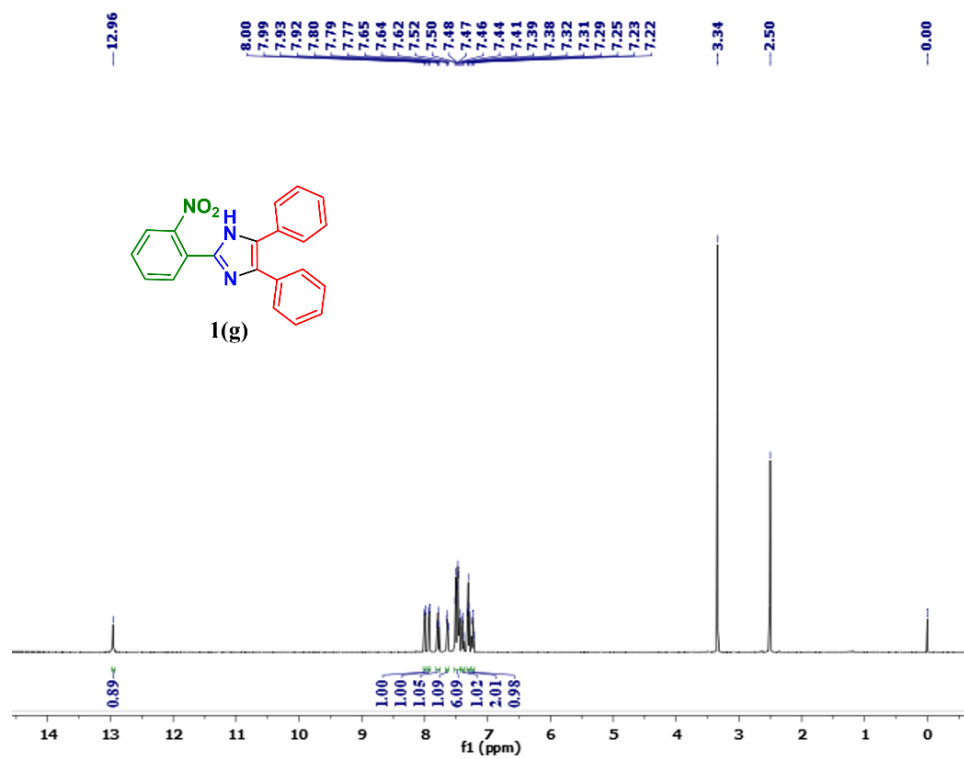

**Figure S11.** <sup>1</sup>H-NMR spectra of **1(g)** recorded in DMSO-d<sub>6</sub>.

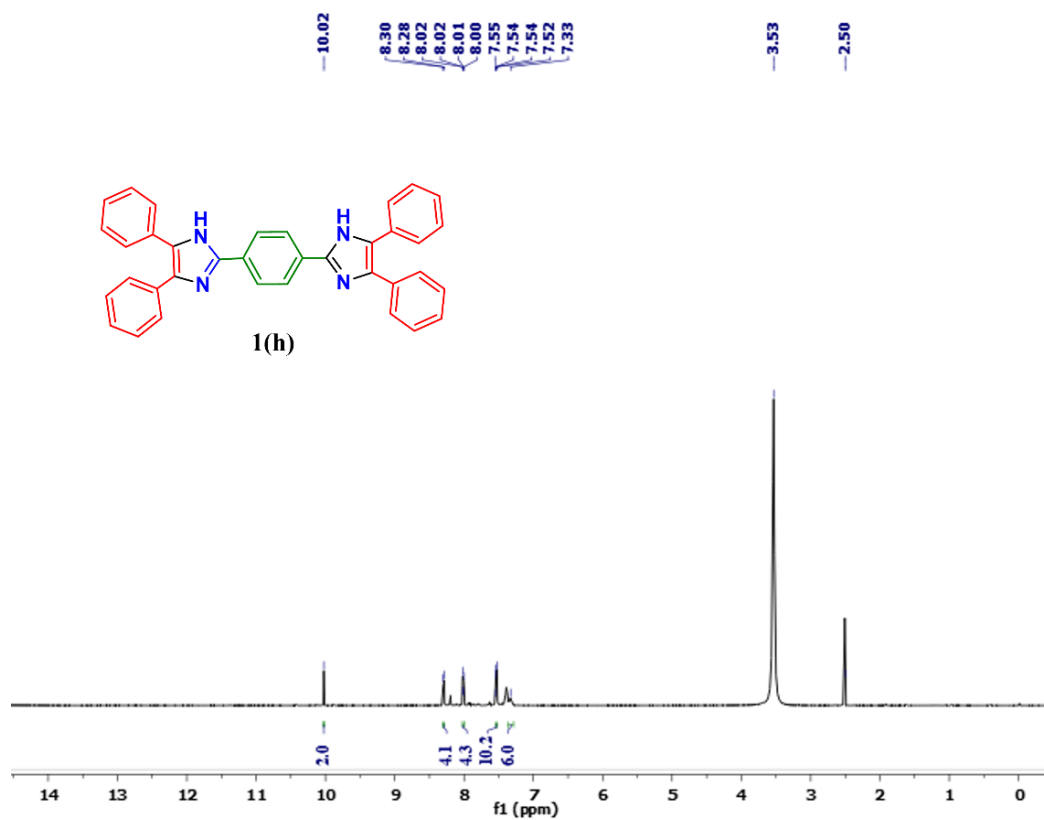

**Figure S12.** <sup>1</sup>H-NMR spectra of **1(h)** recorded in DMSO-d<sub>6</sub>.

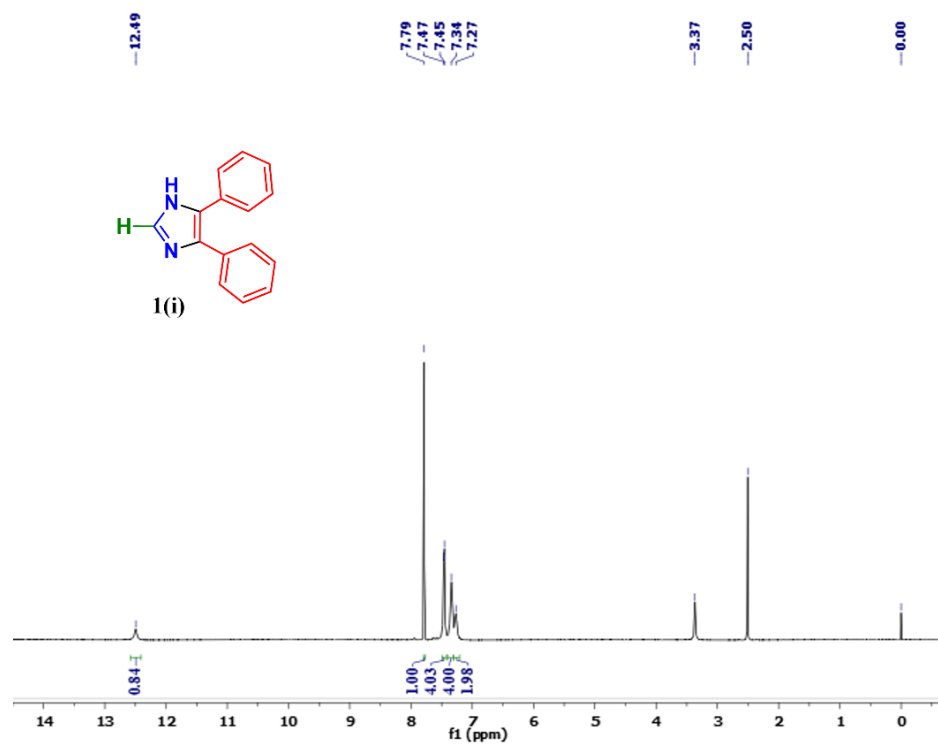

**Figure S13.** <sup>1</sup>H-NMR spectra of **1(i)** recorded in DMSO-d<sub>6</sub>.

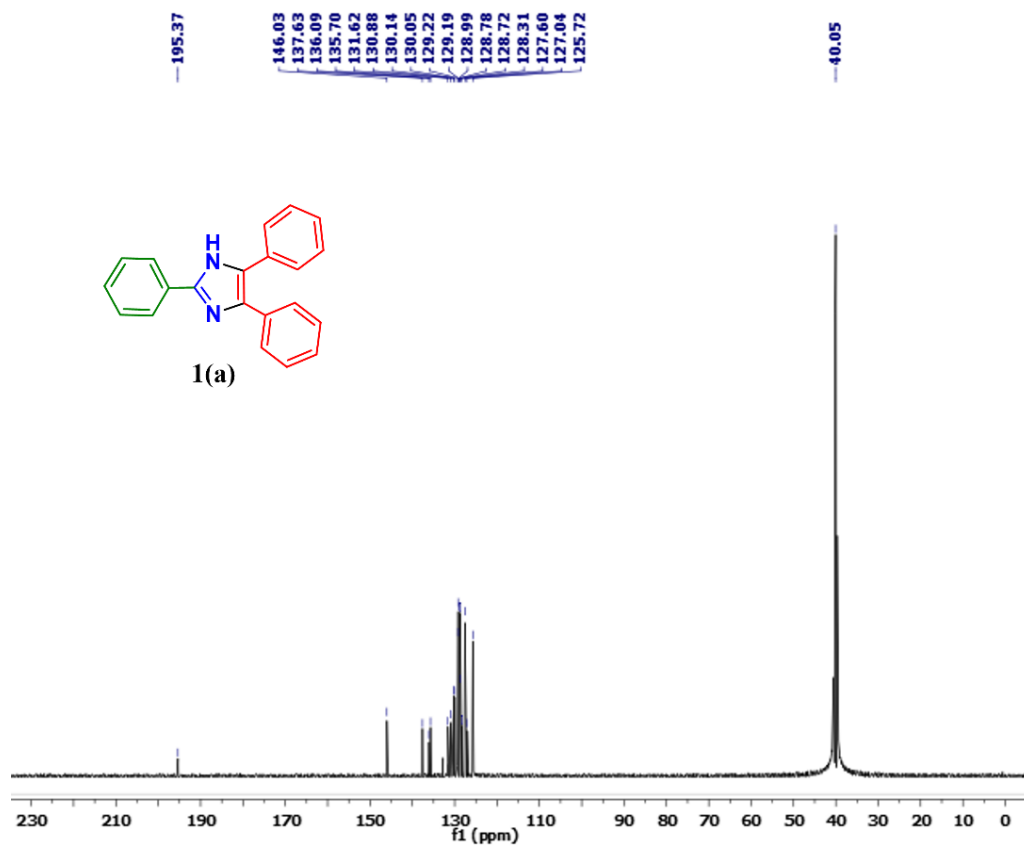

**Figure S14.** <sup>13</sup>C-NMR spectra of **1(a)** recorded in DMSO-d<sub>6</sub>.

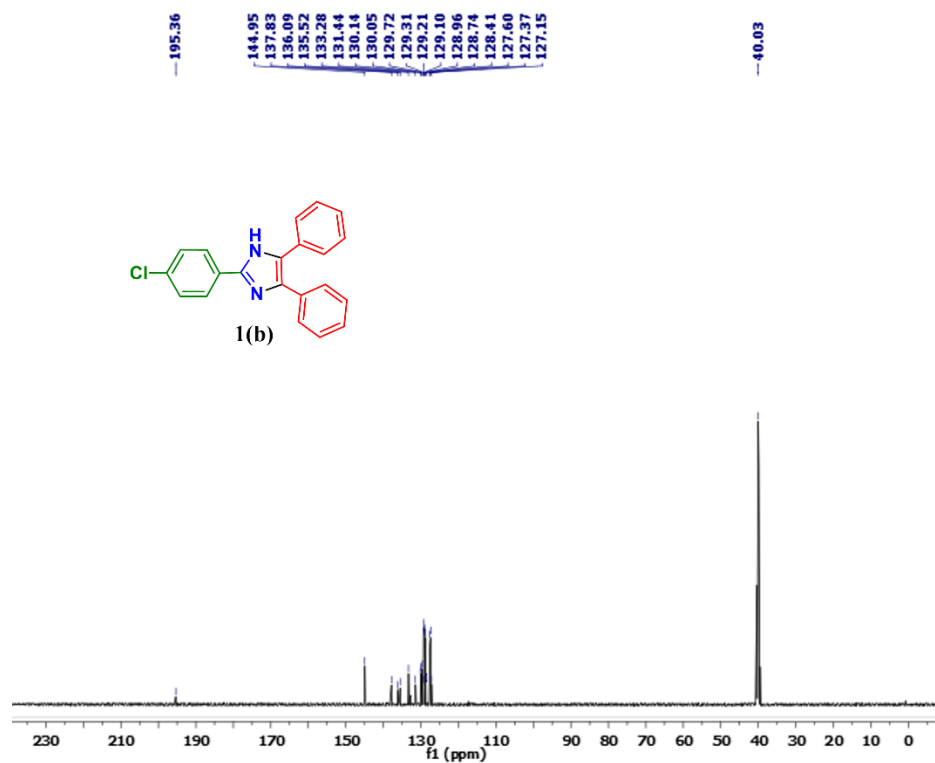

**Figure S15.** <sup>13</sup>C-NMR spectra of **1(b)** recorded in DMSO-d<sub>6</sub>.

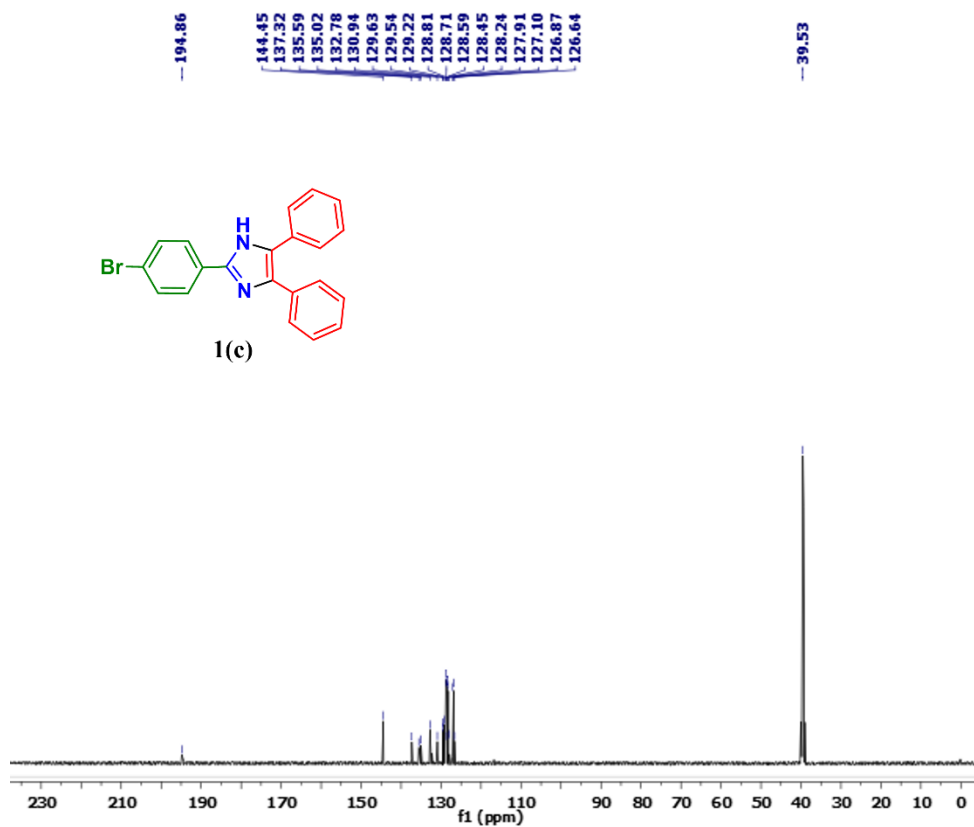

**Figure S16.** <sup>13</sup>C-NMR spectra of **1(c)** recorded in DMSO-d<sub>6</sub>.

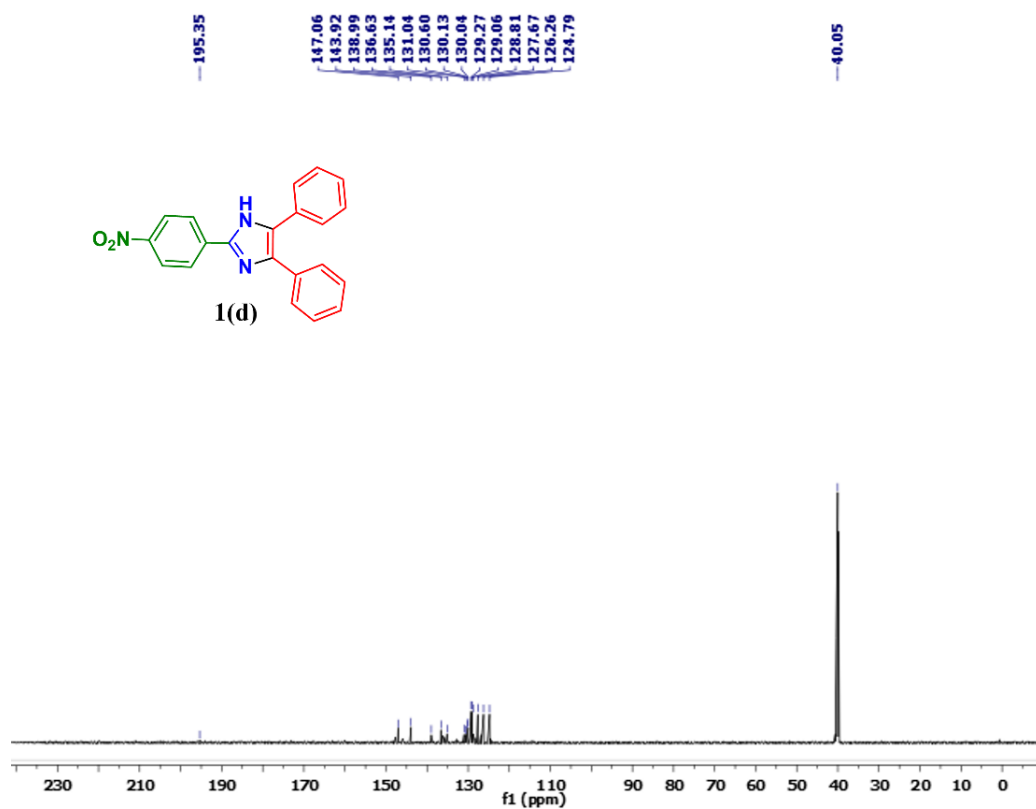

**Figure S17.** <sup>13</sup>C-NMR spectra of **1(d)** recorded in DMSO-d<sub>6</sub>.

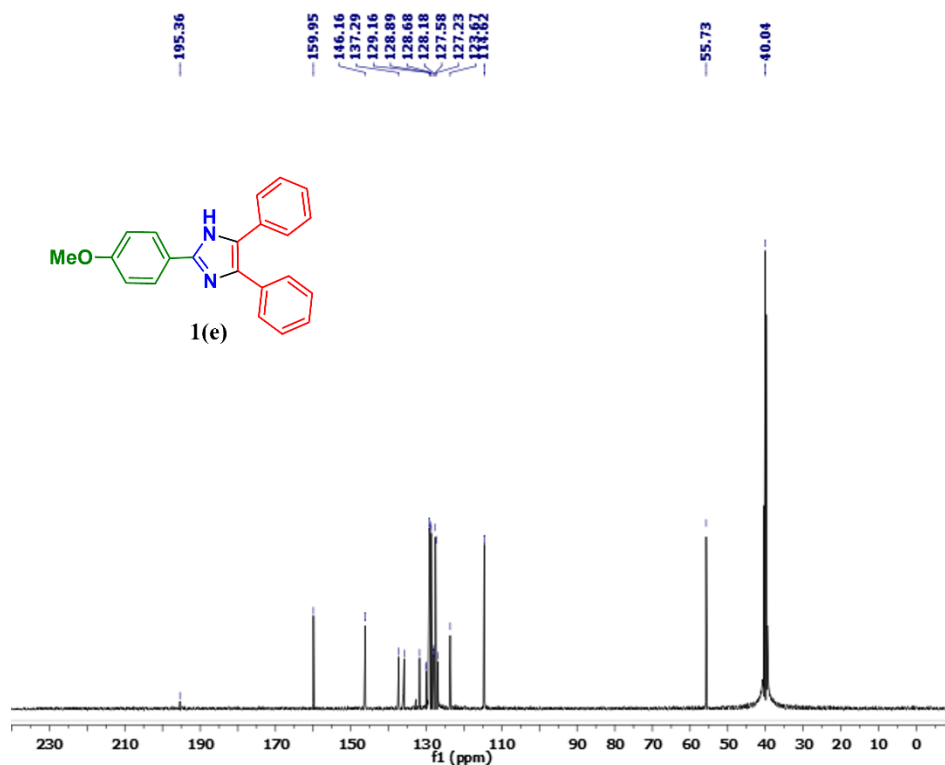

**Figure S18.** <sup>13</sup>C-NMR spectra of **1(e)** recorded in DMSO-d<sub>6</sub>.

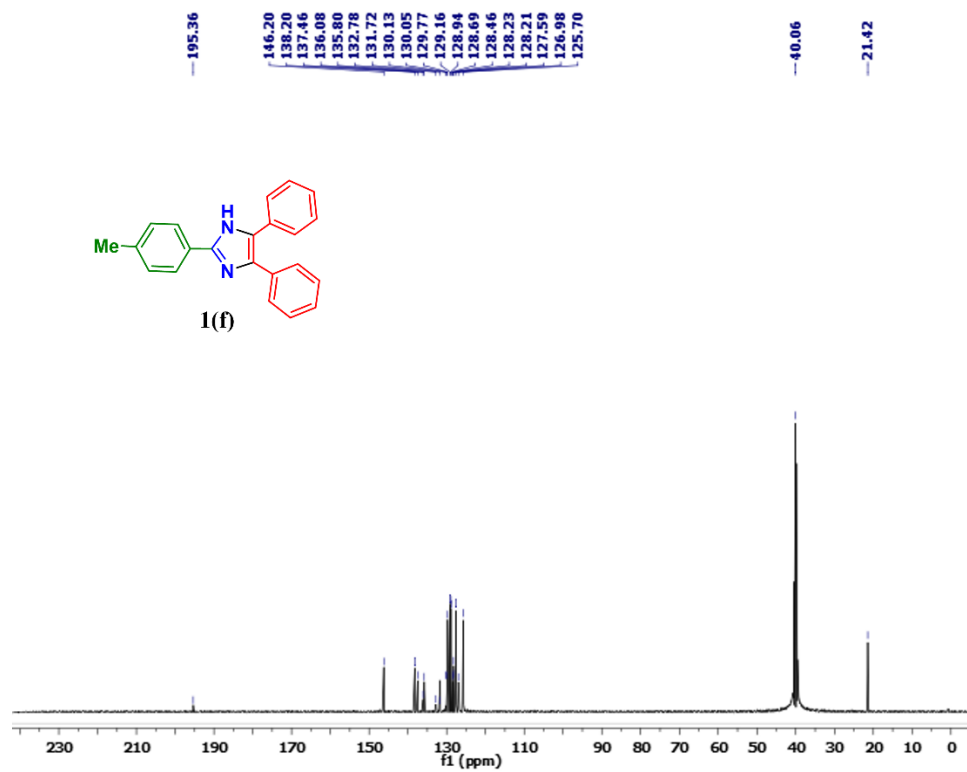

**Figure S19.** <sup>13</sup>C-NMR spectra of **1(f)** recorded in DMSO-d<sub>6</sub>.

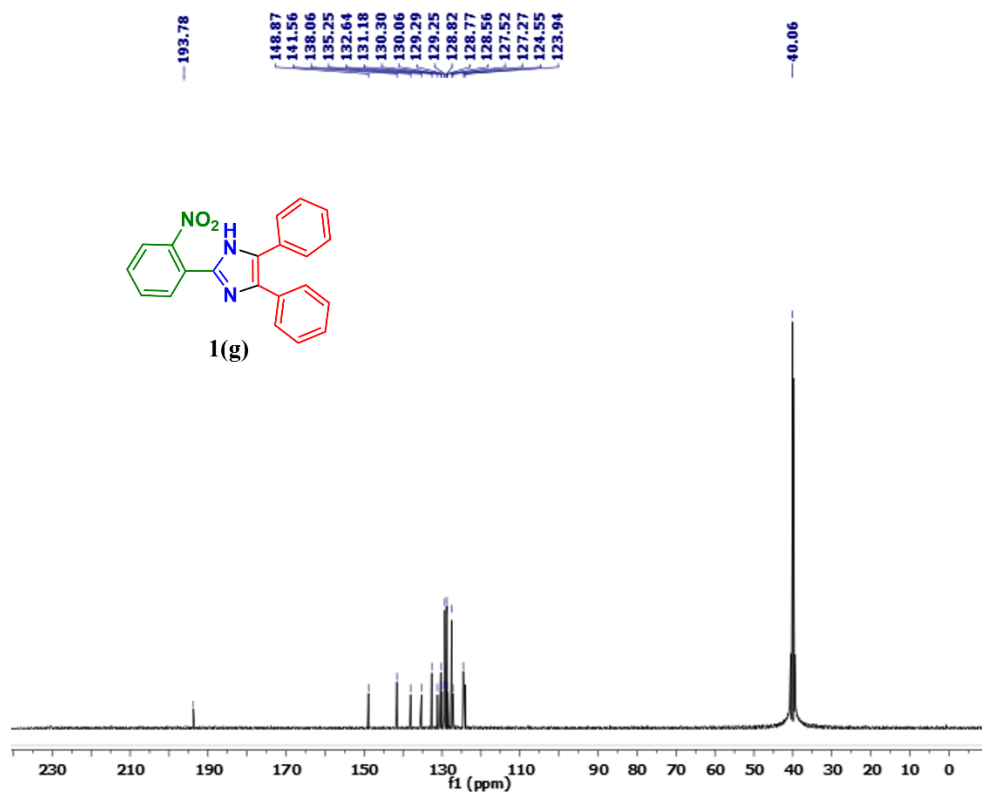

**Figure S20.** <sup>13</sup>C-NMR spectra of **1(g)** recorded in DMSO-d<sub>6</sub>.

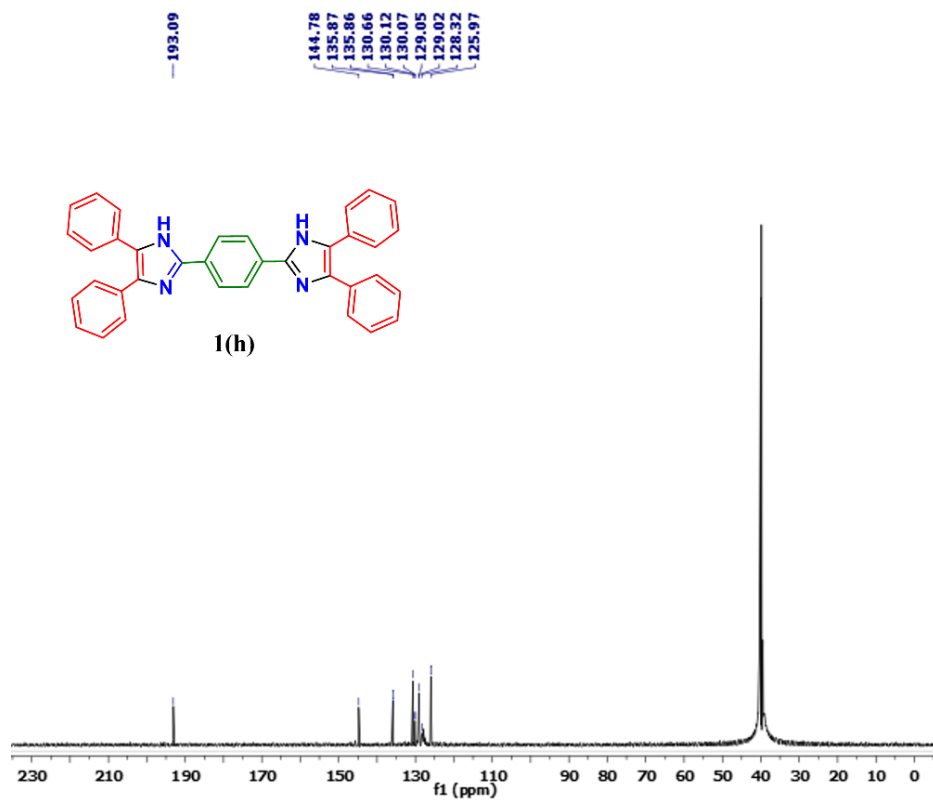

**Figure S21.** <sup>13</sup>C-NMR spectra of **1(h)** recorded in DMSO-d<sub>6</sub>.

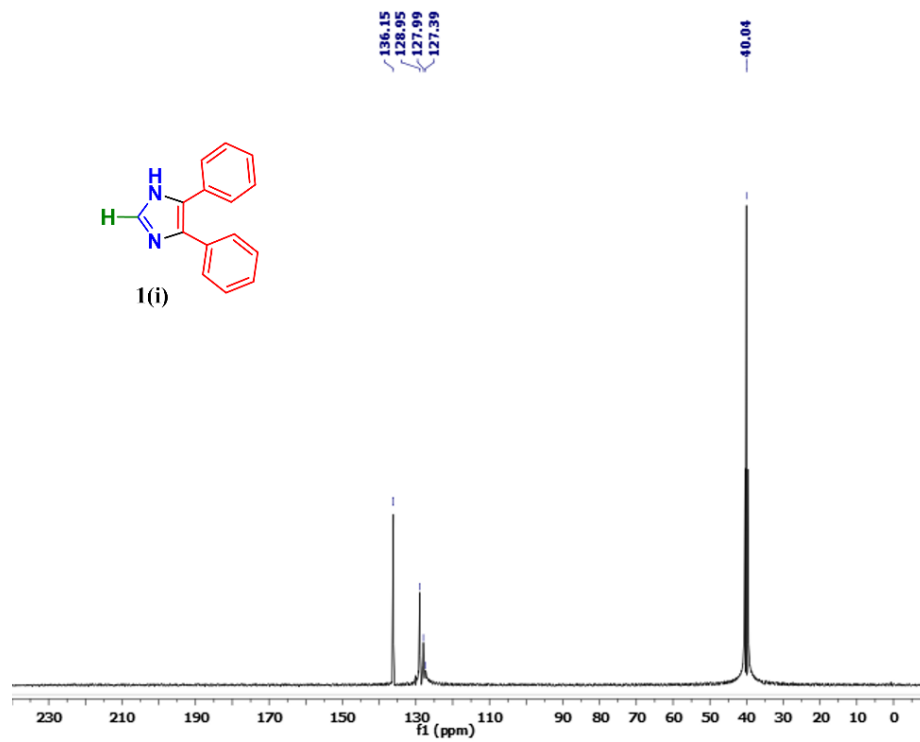

**Figure S22.** <sup>13</sup>C-NMR spectra of **1(i)** recorded in DMSO-d<sub>6</sub>.
